# Supplementary material for: Desmin and Plectin Recruitment to the Nucleus and Nuclei Orientation Are Lost in Emery-Dreifuss Muscular Dystrophy Myoblasts Subjected to Mechanical Stimulation
Source: Cells. 2024 Jan 16;13(2):162. doi: 10.3390/cells13020162 (PMC10814836; doi:10.3390/cells13020162)
Supplement: Supplementary file 1 [file cells-13-00162-s001.zip]

Archive with 9 entries (9 files):
- figure s1.tif
- figure S2.tif
- Figure S3.tif
- Figure S4.tif
- Figure S5.tif
- Figure S6.tif
- Figure S7.tif
- figure S8.tif
- Supplementary Materials 08.01.24.pdf
